1 **Crystal structure of the giant panda MHC class I complex: first insights into the viral**  
2 **peptide presentation profile in the bear family**

3 Hongyu Yuan<sup>1,2</sup>, Lizhen Ma<sup>1</sup>, Lijie Zhang<sup>1</sup>, Xiaoying Li<sup>1,3</sup> and Chun Xia<sup>1</sup>

4 <sup>1</sup>Department of Microbiology and Immunology, College of Veterinary Medicine, China  
5 Agricultural University, Haidian District, Beijing 100193, China

6 <sup>2</sup>National Laboratory of Biomacromolecules, Institute of Biophysics, Chinese Academy of  
7 Sciences, Beijing 100101, China

8 <sup>3</sup>School of Basic Medical Sciences, Xinxiang Medical University, Xinxiang, Henan, China

9 Correspondence: Prof. Chun Xia (xiachun@cau.edu.cn)

10 **Running title:** Crystal structure of giant panda MHC-I

11 **Keywords:** Crystal structure; Giant panda; MHC-I; Peptide presentation; Evolution

12 **ABSTRACT**

13 The viral cytotoxic T lymphocyte (CTL) epitope peptides presented by classical MHC-I  
14 molecules require the assembly of a peptide-MHC-I- $\beta$ 2m (aka pMHC-I) trimolecular complex  
15 for TCR recognition, which is the critical activation link for triggering antiviral T cell immunity.  
16 Ursidae includes 5 genera and 8 species; however, research on T cell immunology in this family,  
17 especially structural immunology, is lacking. In this study, the structure of the key trimolecular  
18 complex pMHC-1 (aka pAime-128), which binds a peptide from canine distemper virus, was solved  
19 for the first time using giant panda as a representative species of Ursidae. The structural  
20 characteristics of the giant panda pMHC-I complex, including the unique pockets in the  
21 peptide-binding groove (PBG), were analyzed in detail. Comparing the panda pMHC-I to others  
22 in the bear family and extending the comparison to other mammals revealed distinct features.  
23 The interaction between MHC-I and  $\beta$ 2m, the features of pAime-128 involved in TCR docking  
24 and CD8 binding, the anchor sites in the PBG, and the CTL epitopes of potential viruses that  
25 infect pandas were concretely clarified. Unique features of pMHC-I viral antigen presentation  
26 in the panda were revealed by solving the three-dimensional structure of pAime-128. The  
27 distinct characteristics of pAime-128 indicate an unusual event that emerged during the  
28 evolution of the MHC system in the bear family. These results provide a new platform for  
29 research on panda CTL immunity and the design of vaccines for application in the bear family.

30 **IMPORTANCE**

31 Ursidae includes 5 genera and 8 species; however, the study of its immunology, especially  
32 structural immunology, is extremely rare to date. In this paper, we first crystallized the key  
33 complex pMHC-I, taking the giant panda as its representative species. Structural characteristics  
34 of the giant panda pMHC-I complexes, contains the unique pockets of PBG were analyzed in  
35 detail. Comparison of the panda pMHC-I in the bear family and other mammals, almost definite  
36 features was displayed. Meanwhile, the interaction between HC and LV, the unique features of  
37 pMHC-I in the CD8 binding and TCR docking, validation of anchor site in the PBG, and  
38 epitopes of potential viruses infected with the pandas, were concretely clarified. These unique  
39 characteristics of pMHC-I clearly indicate an unusual situation during the evolution of MHC  
40 molecules in the endangered pandas. These results also provide a novel platform for further  
41 study of panda T cell immunology and vaccines.

## 42 INTRODUCTION

43 The cytotoxic T lymphocytes (CTLs) and their immune responses are common to various  
44 genera of jawed vertebrates. Common CTLs include CD8<sup>+</sup> T cells, which recognize only  
45 antigens presented by classical major histocompatibility complex class I (MHC-I) molecules  
46 (1). MHC-I genes are expressed in most nucleated cells and present antigens derived mostly  
47 from intracellular viruses, parasites, and tumors (2). Structural studies of MHC-I molecules  
48 have shown that the complex is generally composed of an MHC-I,  $\beta$ 2-microglobulin ( $\beta$ 2m),  
49 and peptide (pMHC-I) (3). The MHC-I contains  $\alpha$ 1,  $\alpha$ 2 and  $\alpha$ 3 domains in its extracellular  
50 region, with the  $\alpha$ 1 and  $\alpha$ 2 domains forming the pMHC-I peptide-binding groove (PBG) (4-9).  
51 Antigen peptides 8-11 amino acids in length are loaded onto the PBG and subsequently  
52 recognized by TCR expressed on the surface of CD8<sup>+</sup> T cells (10). Interactions between the  
53 pMHC-I complex and TCR form the first signal for the activation of antigen-specific CD8<sup>+</sup> T  
54 cells (11). The direct interaction between TCR and pMHC-I demonstrates the MHC-I-  
55 restriction nature of CD8<sup>+</sup> T cell recognition and indicates a close evolutionary relationship  
56 between pMHC-I and TCR (12, 13). It is widely accepted that in addition to direct interaction  
57 with TCR, MHC-I engagement of the CD8 coreceptor is required for the functional activation  
58 of CD8<sup>+</sup> T cells (14). The transmembrane glycoprotein CD8 molecules bind to pMHC-I and  
59 recruit the Src tyrosine kinase p56lck (Lck) to the TCR-pMHC-I complex, resulting in the  
60 assembly of a TCR-pMHC-I-CD8 ternary complex (15). Therefore, the presentation of various  
61 endogenous peptides by the pMHC-I complex is key in determining whether the antiviral CTL  
62 immune response is initiated.

63 The structures and functions of pMHC-I complexes that bind viral peptides or peptides have  
64 been investigated in humans (16), mice (17), monkeys (9), cattle (8), pigs (5), horses (18), dogs  
65 (6), cats (4), chickens (19), and a bony fish (20). The polymorphism of MHC-I molecules causes  
66 variation in PBGs in various mammalian pMHC-I complexes, which triggers various types of  
67 CTL immune responses. Although there are many reports of mammalian pMHC-I complexes,  
68 no study has yet been conducted on the pMHC-I structure in the bear family (Ursidae), which  
69 includes the giant panda. The bear family includes 5 genera and 8 species. Classical MHC-I  
70 genes and polymorphisms in the giant panda (*Ailuropoda melanoleuca*), brown bears and the  
71 Asiatic black bear have been reported. Phylogenetic studies indicate that although the giant  
72 panda belongs to the bear family, divergence between the giant panda and other bears occurred  
73 approximately >17 million years ago (21). The giant panda has an estimated population size of  
74 approximately 2500 individuals worldwide, and its classical MHC-I/II genes are located on  
75 chromosome 9q (22). The large genetic region of MHC-I is believed to play critical roles in  
76 CTL immunity. In addition, the giant panda MHC-I molecules represent an important model  
77 for understanding the structural and functional characteristics of these antiviral complexes in  
78 the bear family.

79 Several studies have been performed to identify giant panda MHC-I genes. In early work, three  
80 classical MHC-I genes (including *Aime-128*) were identified in the giant panda, and the *Aime-*  
81 *128* gene was proven to include ten conserved amino acids critical for viral antigenic peptide  
82 binding as described by human leukocyte antigen I (HLA-I) (23). Subsequent genetic analysis  
83 identified six panda MHC-I genes, four of which are classical MHC-I genes (24). High levels

84 of genetic variation have been demonstrated in the panda MHC-I molecules (25), which is  
85 consistent with the selective advantage of MHC polymorphisms when encountering numerous  
86 types of pathogens (2). Pandas appear to be highly susceptible to zoonoses. Cases of canine  
87 distemper virus (CDV) and canine coronavirus (CCV) infections have occurred in panda  
88 populations (26, 27). Therefore, it is important to elucidate key molecules, such as the pMHC-  
89 I complex, and the antiviral CTL immune response of the panda, to aid vaccine development  
90 and the development of effective treatments for various diseases. In this report, the panda was  
91 chosen as a representative species of the bear family, and its pMHC-I structure (aka pAime-  
92 128) was determined by X-ray crystal diffraction. The PBG of panda pMHC-I has distinct  
93 features, from the amino acid sequence to the three-dimensional (3D) structure, and pAime-  
94 128 also reflects the features of the bear family. The findings reveal specific characteristics of  
95 the giant panda pMHC-I structure, greatly enhancing the understanding of MHC-I-related  
96 antiviral immunity in the bear family.

## 97 RESULTS

### 98 Structural Framework of Panda pAime-128

99 To verify the binding of these viral peptides to the giant panda pMHC-I (pAime-128), *in vitro*  
100 refolding experiments were carried out. The results revealed that four peptides can form stable  
101 pAime-128 complexes (**Supplementary Fig 1 and Table 1**). The complex of Aime-128 and  
102 Aime- $\beta$ 2m with the CCV-NGY9 peptide was crystallized in the P4<sub>3</sub>2<sub>1</sub>2 orthorhombic space  
103 group with a resolution of 2.68 Å (**Table 2**). The viral CCV-NGY9 peptide (CCV-NGY9) was  
104 selected from the CCV spike protein (S protein), which is among the structural proteins encoded  
105 by ORF2 (**Figure 1**). Similar to the S proteins of other coronaviruses, the S protein of CCV  
106 plays a fundamental role in the interaction with the cellular receptor and induces neutralizing  
107 antibodies in the natural host (28). Two complexes of pAime-128, molecule 1 (aka M1) and  
108 molecule 2 (aka M2), were found in one asymmetric unit. The root-mean-square deviation  
109 (RMSD) of the two molecules of Aime-128 was 0.584 Å. Because of the high consistency  
110 between M1 and M2, the following analysis of pAime-128 was based mainly on M1 (i.e.,  
111 pAime-128 is M1 unless otherwise specified). The Aime-128 H chain contains the  $\alpha$ 1 (residues  
112 1 to 90),  $\alpha$ 2 (residues 91 to 182) and  $\alpha$ 3 (residues 183 to 275) domains, of which the  $\alpha$ 1 and  $\alpha$ 2  
113 domains constitute the PBG (**Fig 1A and B**). The  $\alpha$ 1 and  $\alpha$ 2 domains of the Aime-128 can be  
114 divided into two portions: one portion ( $\alpha$ 1, residues 57 to 84;  $\alpha$ 2, residues 138 to 150 and 152  
115 to 176) forms helices located at the top of PBG, and the remaining portion (residues 3 to 13, 20  
116 to 28, 31 to 37, 46 to 47, 93 to 103, 110 to 118, 121 to 126, and 133 to 135) forms an eight-  
117 stranded  $\beta$ -sheet platform at the bottom, named A to H. The CCV-NGY9 is loaded onto PBG  
118 of pAime-128 (**Fig 1B**).

119 Further analysis showed that strands and loops of Aime- $\beta$ 2m broadly interact with Aime-128,  
120 and the numbers and patterns of hydrogen bonds formed in these interactions were similar to  
121 those of other mammalian MHC I molecules. Analysis revealed that a depth of Aime- $\beta$ 2m in  
122 Aime-128 up to 1351.1 Å<sup>2</sup> (**Fig 1C**). In addition, the hydrogen bonds involved in the  
123 interactions between Aime-128 and Aime- $\beta$ 2m were found to differ from those in humans.  
124 Aime- $\beta$ 2m forms only 15 hydrogen bonds with Aime-128, whereas in HLA-B\*5101,  $\beta$ 2m can  
125 form 25 hydrogen bonds with MHC-I (29), which implies the interactions are weaker than  
126 humans (**Fig 1C**). Thus, the main function of  $\beta$ 2m is to stabilize MHC-I, even though the same  
127  $\beta$ 2m can interact with MHC-I in various ways. The main role of  $\beta$ 2m is to ensure the stable  
128 function of pMHC-I, and the manner of its interaction with MHC-I is thought to be able to  
129 promote side effects such as  $\beta$ 2m dissociation and even diseases (29).

### 130 The Unique Pockets for Antigen-binding Peptide Found in pAime-128

131 The amino acids in PBG form six functional pockets, named pockets A to F, to accommodate  
132 residues of the CCV-NGY9 peptide (**Fig 2**). Pocket A in pAime-128 consists of residues Met<sup>5</sup>,  
133 Tyr<sup>7</sup>, Tyr<sup>59</sup>, Arg<sup>62</sup>, Asn<sup>63</sup>, Tyr<sup>159</sup>, Glu<sup>163</sup>, Trp<sup>167</sup> and Tyr<sup>171</sup> (**Table 3**). P1-Asn of CCV-NGY9 was  
134 inserted into pocket A. Based on the 3D structures of pMHC-I in different species, Asn<sup>63</sup> and  
135 Glu<sup>163</sup> of Aime-128 are rare among all of the known class I molecules, i.e., these residues are  
136 found in only certain alleles, such as HLA-B\*5101 and HLA-B\*2705 (**Fig 2**). Due to the  
137 presence of residue Asn<sup>63</sup> in Aime-128, pocket A of this molecule is considered to be tighter

138 than that of the other pMHC-I complexes (**Fig 3**).

139 Residues Tyr<sup>7</sup>, Tyr<sup>9</sup>, Ala<sup>24</sup>, Met<sup>45</sup>, Asn<sup>63</sup>, Ile<sup>66</sup>, Ala<sup>67</sup> and His<sup>99</sup> form pocket B of PBG in pAime-  
140 128 (**Fig 3 and Table 3**). P2-Gly of CCV-NGY9 is tethered by hydrogen bonds to residues in  
141 PBG and fits into the small pocket B. In most class I molecules, the residues at positions 63 and  
142 66 are Glu and Lys, respectively, which are both charged residues. The residue at position 99  
143 of Aime-128 is His instead of the conserved Tyr residue; both of these residues have a large  
144 side chain, but they have different charges (**Fig 2**). Pocket B of pAime-128 extends deep under  
145 the  $\alpha$ 1 helix and touches the Met45 residue, which is one of the most polymorphic residues in  
146 mammalian MHC-I molecules (**Fig 3**).

147 Pocket C of pAime-128 is composed of residues Asn<sup>70</sup>, Phe<sup>74</sup>, Trp<sup>97</sup> and Leu<sup>116</sup> and shows an  
148 obvious negative charge, and none of these residues are highly conserved among known  
149 mammalian class I molecules (**Fig 2**). Pocket C is wide but shallow. P5-Phe and P6-Phe of  
150 CCV-NGY9 are located in this pocket, and no hydrogen bonds exist between the C pocket and  
151 the peptide, only van der Waals forces. The side chain of P6-Phe extends outward into the  
152 solvent and may play a role in TCR docking (**Fig 3**).

153 Pocket D in pAime-128 accommodates the side chains of P3 and P4 residues. The pocket  
154 consists of residues Ile<sup>66</sup>, Trp<sup>97</sup>, His<sup>99</sup>, Ser<sup>114</sup>, Glu<sup>152</sup>, Arg<sup>155</sup>, Tyr<sup>156</sup> and Tyr<sup>159</sup> (**Table 3**). In the  
155 peptide CCV-NGY9, the residue at position 3 is Tyr, which has a large side chain and, as a  
156 result, forms two hydrogen bonds and many van der Waals interactions with pocket D (**Fig 3**).  
157 The side chain of P3 is inserted into pocket D and forms hydrogen bonds with Glu<sup>152</sup> and Arg<sup>155</sup>.  
158 Notably, Glu<sup>152</sup> and Arg<sup>155</sup> are not conserved in most mammalian class I molecules, and both  
159 of these residues are charged (**Fig 2**). P3-Tyr is primarily surrounded by the residues Trp<sup>97</sup>,  
160 His<sup>99</sup>, Tyr<sup>156</sup> and Tyr<sup>159</sup>, which have large side chains and provide a clear boundary to pocket D.  
161 The small residue Ser<sup>114</sup> provides enough space in the pocket to accommodate the large side  
162 chain of P3-Tyr (**Fig 3**). The side chain of P4-Asn extends outward into the solvent for potential  
163 recognition by TCRs. Different formations of hydrogen bonds between the PBG and the peptide  
164 were also observed for peptide residues P3-Tyr and P4-Asn.

165 Pocket E is composed of residues Ser<sup>114</sup>, Gln<sup>115</sup>, Leu<sup>116</sup>, Trp<sup>133</sup>, Trp<sup>147</sup> and Glu<sup>152</sup> (**Fig 2 and**  
166 **Table 3**). The pocket is obviously negatively charged and located relatively deep beneath the  
167  $\alpha$ 2 helix, and residues Ser<sup>114</sup>, Gln<sup>115</sup> and Leu<sup>116</sup> constitute the bottom of platform. P7-Ser of  
168 CCV-NGY9 is inserted into pocket E (**Fig 3**).

169 Pocket F of pAime-128 PBG consists of the highly conserved residues Ala<sup>117</sup>, Tyr<sup>118</sup>, Tyr<sup>123</sup>,  
170 Ile<sup>124</sup>, Thr<sup>143</sup>, Lys<sup>146</sup> and Trp<sup>147</sup>, as well as the poorly conserved residues Ala<sup>73</sup>, Phe<sup>74</sup>, Asp<sup>77</sup>,  
171 Thr<sup>80</sup>, Ile<sup>95</sup> and Leu<sup>116</sup> (**Fig 2**). Among these residues, Leu116 is not present in any other  
172 annotated MHC class I molecule deposited in the Protein Data Bank (18, 19). Pocket F is  
173 therefore narrow but deep enough to accommodate large residues, and residues P8-Thr and P9-  
174 Phe are located in this pocket (**Fig 3**). The anchor residue P9-Phe is similar to the anchor  
175 residues of HLA-A\*01, HLA-B\*35, and HLA-B\*57, i.e., large residues with an aromatic ring  
176 (30). The aromatic ring in CCV-NGY9 is held in close contact with residues in pocket F by  
177 strong hydrogen bonds and van der Waals contacts (**Fig 3**).

## 178 **Comparison of panda Aime-128 to Other Known MHC-I Molecules**

179 The amino acid homology of MHC-I molecules in giant pandas is approximately 70-90%, but  
180 the homology of the peptide-binding domains composed of the  $\alpha 1$  and  $\alpha 2$  regions is low (**Fig**  
181 **3**). These results suggest that the antigen-peptide presenting profiles of the panda individuals  
182 are different, especially the homology of the  $\alpha 1$  region, which can be as low as approximately  
183 57%; thus, the difference is large. The results also show the potential differences in pMHC-I  
184 complexes among the bear family. It can be concluded that classical MHC-I binding antigen-  
185 peptide profiles of the bear family are diverse.

186 Structure-based amino acid sequence analysis implied that MHC-I molecules may form  
187 different PBGs in pandas. However, the amino acid composition of the A, B, C, D, E and F  
188 pockets in the PBG was not identical among pandas, and the PBG regions of the pandas differed  
189 extensively from those of other members of the bear family (**Fig 3**). Of the ten conserved amino  
190 acids in the  $\alpha 1$  and  $\alpha 2$  domains of Aime-128 predicted to be critical for peptide binding (23),  
191 only eight (Met<sup>5</sup>, Tyr<sup>7</sup>, Tyr<sup>59</sup>, Tyr<sup>84</sup>, Thr<sup>143</sup>, Lys<sup>146</sup>, Tyr<sup>159</sup> and Tyr<sup>171</sup>) were confirmed in our study  
192 to have direct contact with the CCV-NGY9 peptide (**Table 3**). In addition, the amino acid  
193 composition of PBGs among other genera and members of the bear family is not completely  
194 conserved, so there are some differences in pockets A to F. There are also great differences  
195 among giant pandas; other members of the bear family; other mammals; such as humans and  
196 mice; and nonmammals, such as the bony fish grass carp (**Fig 3**).

## 197 **Validation of Anchor Sites and Binding Motif in pAime-128**

198 The peptide binding to pAime-128 PBG used in a featured mode with a central bulge, as  
199 revealed by unambiguous electron density (**Fig 4A**). Extensive comparison of pAime-128 with  
200 other pMHC-I structures deposited in the Protein Data Bank showed that the main chain of the  
201 CCV-NGY9 peptide has a characteristic conformation similar to that presented by HLA-  
202 B\*0801 (**Fig 4B**). Ternary TCR-peptide-HLA-B\*0801 structure of epitope HCV-HSK9  
203 (HSK<sup>4</sup>KKCDEL, hepatitis C virus-derived) showed that the protruding residue Lys-4 in HCV-  
204 HSK9 plays important roles in TCR recognition (31, 32). In pAime-128, the side chain of P6-  
205 Phe pointed upward for solvent exposure, similar to the side chain of Lys-4 in HCV-HSK9 (**Fig**  
206 **4A and B**).

207 With different peptide presentation modes observed for pAime-128, it is necessary to clarify  
208 the critical anchors for the peptide bound to Aime-128. Therefore, the stabilities of the CCV-  
209 NGY9 peptide and its mutants with alanine substitution at each position bound with Aime-128  
210 were measured through circular dichroism (CD) spectroscopy (**Fig 4C and D**). The midpoint  
211 transition temperature (T<sub>m</sub>) value of the wild-type CCV-NGY9 peptide was determined to be  
212 49.3°C. Compared with the CCV-NGY9 peptide, the CCV-P9A-substituted peptide showed a  
213 dramatic decrease in stability with the lowest T<sub>m</sub> at 39.4°C, while the peptide mutants CCV-  
214 P1A and CCV-P5A had lower T<sub>m</sub>s of 47.2°C and 47.4°C, respectively, indicating a minor  
215 decrease in stability. The remaining peptide mutants showed different levels of enhanced  
216 stability, with T<sub>m</sub>s ranging from 49.5°C to 54.8°C (**Fig 4C and D**). These data indicated that  
217 for peptides bound to Aime-128, P $\Omega$  plays a pivotal role in peptide anchoring since it cannot  
218 be replaced by alanine. The peptide residues at the N terminus (PN) and position 5 (P5) are also

219 important for stabilization of pAime-128 complex. Notably, the mutant CCV-P2A displayed the  
220 highest T<sub>m</sub> of 54.8°C, suggesting that the mutation of P2-G to comparatively large amino acids  
221 might increase the stability of pAime-128 complexes. Based on this finding and the peptide  
222 screening results (**Table 1**), we identified the motif of pAime-128 presented peptides. The  
223 binding motif of pAime-128 is (Ala, Asn, Thr or Glu)-(Ala, Gly, Ser, Thr or Val)-x-x-(Ala, Phe,  
224 Arg, Pro, Tyr)-x-x-x-(Phe or Leu).

### 225 **Distinctive Interaction of Aime-128 and $\beta$ 2m/TCR/CD8 Molecules**

226 Superposing pAime-128 molecule on the known pMHC-I structures from different species  
227 showed that the AB loop of pAime-128 and other mammal pMHC-I structures does not contact  
228  $\beta$ 2m (**Fig 5A-E**), whereas the AB loop binds  $\beta$ 2m via hydrogen bonds only in nonmammals  
229 (**Fig 5F, G**). Furthermore, the CD and EF loops of mammals are longer than those of  
230 nonmammals (**Fig 5A**), because mammalian MHC-I contains two more amino acids than  
231 nonmammalian MHC-I (**Fig 2**).

232 The antigenic peptides presented by pMHC-I complexes are eventually scanned and recognized  
233 by TCRs to initiate MHC-I-restricted CD8 T cell immunity. Extensive structural studies have  
234 illustrated that the TCR repertoire specific for a certain antigenic peptide is determined by the  
235 conformations of both the peptide and the restricted MHC-I element (12, 33). Comparisons  
236 with MHC-I structures with known TCR docking strategies revealed that the exposed Aime-  
237 128 residues Arg<sup>62</sup>, Arg<sup>65</sup>, Ile<sup>66</sup>, Asp<sup>69</sup>, Gln<sup>72</sup>, Val<sup>76</sup>, Gln<sup>79</sup>, Glu<sup>154</sup>, Arg<sup>155</sup>, Asn<sup>158</sup>, Glu<sup>161</sup>, Glu<sup>163</sup>,  
238 Glu<sup>166</sup> and Trp<sup>167</sup> have great potential to interact with TCRs (**Fig 6A**). Although most of these  
239 residues are highly conserved or preferentially used among different species, rarely used  
240 residues were observed in Aime-128, including Ile<sup>66</sup>, Asp<sup>69</sup>, Arg<sup>155</sup> and Asn<sup>158</sup> (**Fig 2**).

241 Further analysis found different structures of the  $\alpha$ 3 loop (CD loop) in pAime-128 and other  
242 pMHC-I molecules. The CD loop of Aime-128, encompassing residues 222-228, is believed to  
243 be essential for CD8 interaction (34). Of particular note, the highly conserved residues Glu<sup>222</sup>  
244 and Gln<sup>226</sup>, which have been proven to directly contact CD8 (35), are also present in pAime-  
245 128. Interestingly, the distance between Glu<sup>219</sup> of pCtid-UAAg and Gln<sup>226</sup> of HLA-A\*0201 is  
246 approximately 12.4 Å, and the distance between Gln<sup>222</sup> in BF2\*0401 and Gln<sup>226</sup> of HLA-  
247 A\*0201 is approximately 8.4 Å. The distance between the superposed CD loops of pAime-128  
248 and HLA-A\*0201 is approximately 3.1 Å (**Fig 6B**).

### 249 **Analysis of Peptide-epitopes of Viruses Based on the Motif of Panda pAime-128**

250 The amino acid sequences of the pathogenic viruses related to viral diseases reported in the  
251 giant panda were obtained. Based on the 3D structure of pAime-128, the characteristics of  
252 presentation of viral peptides, and the motif from the experiment, the potential viral CTL  
253 epitopes of canine distemper virus (CDV), canine corona virus (CCV), giant panda  
254 polyomavirus (GPPV), giant panda rotavirus (GPRV), giant panda-associated  
255 gemycircularvirus (GPGE), giant panda anellovirus (GPAN), and influenza H1N1 viruses (36,  
256 37) were reasonably proposed. The results are shown in **Fig. 7**. A series of viral epitope-peptides  
257 from the proteomes of viruses, including CCV, CDV, GPP, GPRV, GPGE, GPAN and H1N1,  
258 were screened against the panda MHC-I molecules. We obtained a total of 8 nonapeptides



259 conforming to virus peptide motif of Aime-128, and synthesize them for *in vitro* verification.  
260 We found that all the selected virus peptides can bind to Aime-128, only one can bind Aime-  
261 128 but cannot tolerate anion-exchange chromatography while the others can tolerate anion-  
262 exchange chromatography. Although the result was rational calculated, it also fully  
263 demonstrates the potential research value of pAime-128.

## 264 DISCUSSION

265 The viral peptides presented by classical MHC-I molecules require the assembly of a pMHC-I  
266 complex for TCR recognition, which is critical for the initiation of antiviral CTL immunity in  
267 most jawed vertebrates (38). In this study, the 3D structure of giant panda classical MHC-I  
268 complexed with viral peptide derived from CCV spike protein was determined for the first time,  
269 and several unique features of panda pMHC-I were identified..

270 One notable finding was that the homologies of classical MHC-I molecules in pandas are high,  
271 at approximately 70-90%", are higher than those of other mammals, being approximately 70-  
272 90%, whereas the homology of the antigen-binding domains composed of  $\alpha 1$  and  $\alpha 2$  regions  
273 is much lower. This result implied that the panda MHC-I molecules can form different PBGs.  
274 In addition, the amino acid composition of the A, B, C, D, E and F pockets in the PBGs are not  
275 identical among pandas, and the PBG regions of pandas and other members the bear family are  
276 very different from one another (**Fig 2**). The results suggest that the antigen-peptide presenting  
277 profiles of the panda individuals are different, especially the homology of the  $\alpha 1$  region, which  
278 can be as low as approximately 57%. This difference may be quite remarkable. Thus, the  
279 classical MHC-I binding antigen-peptide profile of pandas is diverse. These findings indicate  
280 the high-throughput antiviral CTL immune response potential of Ursidae.

281 A second notable finding is that in the PBG pockets, the 9 residues constituting pocket A can  
282 be found in most giant panda MHC-I molecules, though 2 residues, Asn<sup>63</sup> and Glu<sup>163</sup>, are rare  
283 among known MHC-I molecules. Due to the presence of the Asn<sup>63</sup> residue, the pAime-128  
284 complex pocket A is reasonably tight. The 8 residues that constitute pocket B can be found in  
285 almost all classical panda MHC-I molecules, although Asn<sup>63</sup>, Ile<sup>66</sup>, Ala<sup>67</sup> and His<sup>99</sup> are rare  
286 among known panda MHC-I molecules. Moreover, 5 residues constitute pocket C, but these  
287 residues are not highly conserved in mammalian MHC-I molecules (2). Similarly, 5 residues  
288 constitute pocket D, but Glu<sup>152</sup> and Arg<sup>155</sup> are not conserved. Therefore, although some amino  
289 acids are highly conserved in the composition of certain pockets, the different amino acids result  
290 in distinctive pocket conformations and a unique pAime-128 PBG for presenting viral epitope  
291 peptides with specific characteristics. Due to pAime-128, the polymorphism of amino acid  
292 sequences is easily reflected in its 3D structure, which is also important for studying pMHC-I  
293 complexes. In addition, the amino acid composition of PBGs among other genera and members  
294 of the bear family is not completely conservative, so there are some differences in A to F pockets.  
295 There are also great differences between giant pandas and other members of the bear family.  
296 The results also reveal the characteristics of the pMHC-I complexes of pandas and other  
297 members of the bear family and differences between them in their viral antigen-presenting  
298 peptide profiles.

299 Furthermore, by analyzing the structure of pAime-128 and comparing it with the structures of  
300 other known pMHC-Is, we found that the viral peptide in PBG features the "M" configuration  
301 that can activate T cells (45) and that key for recognition by TCR is the combination of the  
302 peptide P4-Asn and P6-Phe amino acids. Through analysis of the pockets in the PBG and the  
303 stability of CCV-NGY9 peptide and its alanine substitution mutant determined by CD  
304 spectroscopy, we identified the peptide-binding motif of pAime-128 and obtained a series of

305 viral peptides that can bind or can potentially bind with pAime-128. The results provide a new  
306 platform for the effective design of bear family viral vaccines.

307 In summary, the structure of pAime-128, as a representative of the bear family pMHC-I  
308 complexes, was elucidated, and unique features of pMHC-I antigen presentation in in the bear  
309 family were identified. In addition, the viral peptide presentation profile was proposed in this  
310 paper. These results provide a new platform for the further study of bear family antiviral CTL  
311 immunology and vaccinology.

## 312 MATERIALS AND METHODS

### 313 Viral Peptide Synthesis

314 Four epitope peptides that potentially bind to Aime-128 were predicted by the NetMHCpan4.0  
315 server (<http://www.cbs.dtu.dk/services/NetMHC/>) and via artificial intelligence selection based  
316 on the CCV spike protein (GenBank accession no. AFG19726.1), the CDV hemagglutinin (H)  
317 protein (GenBank accession no. AAD54600.1), CPV virus protein 1 (VP1) (GenBank accession  
318 no. AAV36771.1) and the H7N9 influenza A virus (GenBank accession no. AGI60301.1).  
319 These peptides were synthesized and purified by reverse-phase high-performance liquid  
320 chromatography (HPLC) (SciLight Biotechnology, Beijing, China) with >90% purity. The  
321 peptides were stored in lyophilized aliquots at -20°C after synthesis and were dissolved in  
322 dimethyl sulfoxide (DMSO) before use.

### 323 Preparation of Expression Constructs

324 DNA fragments encoding the extracellular domain of giant panda MHC-I *Aime-128* (GenBank:  
325 AM282693, residues 1–270 of the mature protein with *NdeI* and *XhoI* restriction sites) and  
326 *Aime-β2m* (GenBank: AB178590, residues 1–98 of the mature protein with restriction sites  
327 *NdeI* and *XhoI*) were synthesized by Invitrogen Life Technologies (Shanghai, China). The  
328 products were ligated into the pET21a vector (Novagen) and then transformed into the  
329 *Escherichia coli* (*E. coli*) Transetta (DE3) strain. Recombinant plasmids were expressed as  
330 inclusion bodies and purified as previously described (29). Complexes of the CCV-NGY9  
331 peptide with Aime-128 and Aime-β2m (pAime-128) were prepared with refolding assays using  
332 the gradual dilution method, as previously described (18). After 48 hours of incubation at 4°C,  
333 the remaining soluble portion of the complex was concentrated and then purified by  
334 chromatography on a Superdex200 16/60 column followed by Resource-Q anion-exchange  
335 chromatography (GE Healthcare), as described previously (18).

### 336 Thermostability Measurements Using Circular Dichroism Spectroscopy

337 The thermostabilities of Aime-128 with nine peptides were tested by CD spectroscopy. CD  
338 spectra were measured at 20°C on a Jasco J-810 spectropolarimeter equipped with a water-  
339 circulating cell holder. The protein concentration was 0.1 mg/mL in pH 8.0 Tris buffer (20 mM  
340 Tris and 50 mM NaCl). Thermal denaturation curves were determined by monitoring the CD  
341 value at 218 nm using a 1-mm optical-path-length cell as the temperature was raised from 25  
342 to 80°C at a rate of 1°C/min. The temperature of the sample solution was directly measured  
343 with a thermistor. The fraction of unfolded protein was calculated from the mean residue  
344 ellipticity ( $\theta$ ) using a standard method. The unfolded fraction (%) is expressed as  $(\theta - \theta_N) / (\theta_U - \theta_N)$ ,  
345 where  $\theta_N$  and  $\theta_U$  are the mean residue ellipticity values in the fully folded and fully unfolded  
346 states, respectively. The midpoint transition temperature ( $T_m$ ) was determined by fitting the data  
347 to the denaturation curves using the Origin 8.0 program (OriginLab) as described previously  
348 (39). Based on the CD spectroscopy results, the nonapeptide binding motifs of Aime-128 were  
349 extrapolated from potential CTL epitopes of viruses detected from giant panda (36).

### 350 Crystallization and Data Collection

351 The purified pAime-128 complexes were ultimately concentrated to 7.5 mg/ml in  
352 crystallization buffer (20 mM Tris–HCl (pH 8.0) and 50 mM NaCl), mixed with reservoir buffer  
353 at a 1:1 ratio, and then crystallized by the hanging-drop vapor diffusion technique at 4°C. Index  
354 Kits (Hampton Research, Riverside, CA) were used to screen the crystals. After several days,  
355 pAime-128 crystals were obtained with Index solution 55 (30% (w/v) polyethylene glycol 3350,  
356 0.05 M magnesium chloride hexahydrate and 0.1 M HEPES (pH 7.5)). Diffraction data were  
357 collected using an in-house X-ray source (Rigaku MicroMax007 desktop rotating anode X-ray  
358 generator with a Cu target operated at 40 kV and 30 mA) and an R-Axis IV imaging-plate  
359 detector at a wavelength of 0.97892 Å. In each case, the crystal was first soaked in reservoir  
360 solution containing 25% glycerol as a cryoprotectant for several seconds and then flash-cooled  
361 in a stream of gaseous nitrogen at 100 K (40). The collected intensities were indexed, integrated,  
362 corrected for absorption, scaled, and merged using the HKL2000 package (41).

### 363 **Structure Determination and Refinement**

364 The structure of pAime-128 was solved by molecular replacement using the MOLREP program  
365 with HLA-B\*5101 (PDB code, 1E27) as the search model. Extensive model building was  
366 performed by hand using COOT (42), and restrained refinement was performed using  
367 REFMAC5. Further rounds of refinement were performed using the phenix refine program  
368 implemented in the PHENIX package (43) with isotropic ADP refinement and bulk solvent  
369 modeling. The stereochemical quality of the final model was assessed with the PROCHECK  
370 program (44). The data collection and refinement statistics are listed in **Table 2**.

### 371 **Structural Analysis and Generation of Illustrations**

372 Peptide-contacting residues were identified using the program CONTACT and were defined as  
373 residues containing an atom within 3.3 Å of the target partner. Structural illustrations and  
374 electron density-related Figs were generated using the PyMOL molecular graphics system  
375 (<http://www.pymol.org>). Solvent-accessible surface areas and B factors were calculated with  
376 CCP4. The multiple sequence alignment was performed by Clustal Omega (45)  
377 (<https://www.ebi.ac.uk/Tools/msa/clustalo/>) and ESPript 3.0 (46)  
378 (<http://esprict.ibcp.fr/ESPript/ESPript/>). Accessible surface area (ASA) and buried surface area  
379 (BSA) were calculated by the online website PDBePISA.

### 380 **Protein Structure Accession Numbers**

381 The crystal structures have been deposited in the Protein Data Bank  
382 (<http://www.pdb.org/pdb/home/home.do>) with accession numbers (5ZE5).

383 **ACKNOWLEDGMENTS**

384 We acknowledge the assistance of the staff at the Shanghai Synchrotron Radiation Facility of  
385 China (SSRF).

386 **AUTHOR CONTRIBUTIONS**

387 H.Y. performed the experiments; H.Y., L.M. and L.Z. analyzed the data and wrote the paper;  
388 X.L. provided constructive suggestions; and C.X. designed and supervised the study. All  
389 authors critically revised the manuscript and gave their final approval of the version to be  
390 submitted.

391 **CONFLICT OF INTEREST**

392 The authors declare that they have no competing interests.

393 **FUNDING**

394 This work was supported by the National Natural Science Foundation of China (Grant NO.  
395 31972683 and 31572493).

396 **SUPPLEMENTARY MATERIAL**

397 **Supplementary Fig 1** Refolding efficiency of pAime-128 complex. Aime-128 and Aime- $\beta_2$ m  
398 were corefolded with different nonapeptides. The refolded products were purified by gel  
399 filtration chromatography and anion-exchange chromatography. pAime-128 complex b curves  
400 are shown in blue. The insets show reducing SDS-PAGE gels (15%) of the peaks that are  
401 labeled on the curve. Lane M contains molecular mass markers (labeled in kD). **(A)** Refolding  
402 efficiency of Aime-128 and Aime- $\beta_2$ m with NGY9. **(B)** Refolding efficiency of Aime-128 and  
403 Aime- $\beta_2$ m with TSV9. **(C)** Refolding efficiency of Aime-128 and Aime- $\beta_2$ m with NTY9. **(D)**  
404 Refolding efficiency of Aime-128 and Aime- $\beta_2$ m with EVW9.

## 405 REFERENCES

- 406 1. **Flajnik MF.** 2018. A cold-blooded view of adaptive immunity. *Nature Reviews Immunology*  
407 **18.**
- 408 2. **Kaufman J.** 2018. Unfinished Business: Evolution of the MHC and the Adaptive Immune  
409 System of Jawed Vertebrates. *Annual Review of Immunology* **36**:383.
- 410 3. **Garstka MA, Alexander F, Celie PHN, Joosten RP, Janssen GMC, Ilana B, Rieuwert H,**  
411 **Magda S, Lennert J, Huib O.** 2015. The first step of peptide selection in antigen presentation  
412 by MHC class I molecules. *Proceedings of the National Academy of Sciences of the United*  
413 *States of America* **112**:1505-1510.
- 414 4. **Liang R, Sun Y, Liu Y, Wang J, Wu Y, Li Z, Ma L, Zhang N, Zhang L, Wei X.** 2018. Major  
415 histocompatibility complex class I (FLA-E\*01801) molecular structure in domestic cats  
416 demonstrates species-specific characteristics in presenting viral antigen peptides. *Journal of*  
417 *Virology*:JVI.01631-01617.
- 418 5. **Fan S, Wu Y, Wang S, Wang Z, Jiang B, Liu Y, Liang R, Zhou W, Zhang N, Xia C.** 2016.  
419 Structural and Biochemical Analyses of Swine Major Histocompatibility Complex Class I  
420 Complexes and Prediction of the Epitope Map of Important Influenza A Virus Strains. *Journal*  
421 *of Virology* **90**:6625-6641.
- 422 6. **Xiao J, Xiang W, Chai Y, Haywood J, Qi J, Ba L, Qi P, Wang M, Liu J, Gao GF.** 2016.  
423 Diversified Anchoring Features the Peptide Presentation of DLA-88\*50801: First Structural  
424 Insight into Domestic Dog MHC Class I. *Journal of Immunology* **197**:2306.
- 425 7. **Ladell K, Hashimoto M, Iglesias MC, Wilmann PG, McLaren JE, Gras S, Chikata T, Kuse**  
426 **N, Fastenackels S, Gostick E, Bridgeman JS, Venturi V, Arkoub ZA, Agut H, van Bockel**  
427 **DJ, Almeida JR, Douek DC, Meyer L, Venet A, Takiguchi M, Rossjohn J, Price DA, Appay**  
428 **V.** 2013. A molecular basis for the control of preimmune escape variants by HIV-specific CD8+  
429 T cells. *Immunity* **38**:425-436.
- 430 8. **Li X, Liu J, Qi J, Gao F, Li Q, Li X, Zhang N, Xia C, Gao GF.** 2011. Two distinct  
431 conformations of a rinderpest virus epitope presented by bovine major histocompatibility  
432 complex class I N\*01801: a host strategy to present featured peptides. *Journal of virology*  
433 **85**:6038-6048.
- 434 9. **Chu F, Lou Z, Chen Yu. Wai, Liu Y, Gao B, Zong L, Khan AH, Bell JI, Rao Z, Gao GF.**  
435 2007. First glimpse of the peptide presentation by rhesus macaque MHC class I: crystal  
436 structures of Mamu-A\*01 complexed with two immunogenic SIV epitopes and insights into  
437 CTL escape. *Journal of Immunology* **178**:944-952.
- 438 10. **Yewdell JW, Haeryfar SM.** 2005. Understanding presentation of viral antigens to CD8+ T cells  
439 in vivo: the key to rational vaccine design. *Annual Review of Immunology* **23**:651-682.
- 440 11. **Gray SM, Kaech SM, Staron MM.** 2015. The interface between transcriptional and epigenetic  
441 control of effector and memory CD8<sup>+</sup> T-cell differentiation. *Nature Reviews Immunology*  
442 **26**:157-168.

- 443 12. **Gruta NLL, Gras S, Daley SR, Thomas PG, Rossjohn J.** 2018. Understanding the drivers of  
444 MHC restriction of T cell receptors. *Nature Reviews Immunology* **18**.
- 445 13. **Marrack P, Scott-Browne JP, Dai S, Gapin L, Kappler JW.** 2008. Evolutionarily conserved  
446 amino acids that control TCR-MHC interaction. *Annual Review of Immunology* **26**:171-203.
- 447 14. **P Anton VDM, Omer D.** 2011. Mechanisms for T cell receptor triggering. *Nature Reviews*  
448 *Immunology* **11**:47-55.
- 449 15. **Huang J.** 2011. Two-Stage Cooperative T Cell Receptor-Peptide Major Histocompatibility  
450 Complex-CD8 Trimolecular Interactions Amplify Antigen Discrimination. *Immunity* **34**:13-23.
- 451 16. **Kirksey TJ, Pogue-Caley RR, Frelinger JA, Collins EJ.** 1999. The structural basis for the  
452 increased immunogenicity of two HIV-reverse transcriptase peptide variant/class I major  
453 histocompatibility complexes. *Journal of Biological Chemistry* **274**:37259.
- 454 17. **Butler N, Theodossis A, Ai, Dunstone M, Nastovska R, Ramarathinam S, Rossjohn J,**  
455 **Purcell A, Perlman S.** 2008. Structural and Biological Basis of CTL Escape in Coronavirus-  
456 Infected Mice. *Journal of Immunology* **180**:3926-3937.
- 457 18. **Yao S, Liu J, Qi J, Chen R, Zhang N, Liu Y, Wang J, Wu Y, Gao GF, Xia C.** 2016. Structural  
458 Illumination of Equine MHC Class I Molecules Highlights Unconventional Epitope  
459 Presentation Manner That Is Evolved in Equine Leukocyte Antigen Alleles. *Journal of*  
460 *Immunology* **196**:1943-1954.
- 461 19. **Zhang J, Yong C, Jianxun Q, Feng G, Yanjie L, Jun L, Xuyu Z, Jim K, Chun X, Gao GF.**  
462 2012. Narrow groove and restricted anchors of MHC class I molecule BF2\*0401 plus peptide  
463 transporter restriction can explain disease susceptibility of B4 chickens. *Journal of Immunology*  
464 **189**:4478-4487.
- 465 20. **Chen Z, Zhang N, Qi J, Chen R, Dijkstra JM, Li X, Wang Z, Wang J, Wu Y, Xia C.** 2017.  
466 The Structure of the MHC Class I Molecule of Bony Fishes Provides Insights into the Conserved  
467 Nature of the Antigen-Presenting System. *Journal of Immunology* **199**:3668.
- 468 21. **Krause J, Unger T, Noçon A, Malaspinas AS, Kolokotronis SO, Stiller M, Soibelzon L,**  
469 **Spriggs H, Dear PH, Briggs AW.** 2008. Mitochondrial genomes reveal an explosive radiation  
470 of extinct and extant bears near the Miocene-Pliocene boundary. *Bmc Evolutionary Biology*  
471 **8**:220-220.
- 472 22. **Li R, Fan W, Tian G, Zhu H, He L, Cai J, Huang Q, Cai Q, Li B, Bai Y, Zhang Z, Zhang**  
473 **Y, Wang W, Li J, Wei F, Li H, Jian M, Li J, Zhang Z, Nielsen R, Li D, Gu W, Yang Z, Xuan**  
474 **Z, Ryder OA, Leung FC-C, Zhou Y, Cao J, Sun X, Fu Y, Fang X, Guo X, Wang B, Hou R,**  
475 **Shen F, Mu B, Ni P, Lin R, Qian W, Wang G, Yu C, Nie W, Wang J, Wu Z, Liang H, Min**  
476 **J, Wu Q, Cheng S, Ruan J, Wang M, et al.** 2009. The sequence and de novo assembly of the  
477 giant panda genome. *Nature* **463**:311.
- 478 23. **Pan HJ, Wan QH, Fang SG.** 2008. Molecular characterization of major histocompatibility  
479 complex class I genes from the giant panda (*Ailuropoda melanoleuca*). *Immunogenetics*  
480 **60**:185-193.



- 481 24. **Ying Z, Sun DD, Ge YF, Yu B, Chen YY, Wan QH.** 2013. Isolation and characterization of  
482 class I MHC genes in the giant panda ( *Ailuropoda melanoleuca* ). Chinese Science Bulletin  
483 **58**:2140-2147.
- 484 25. **Zhu Y, Wan Q-H, Yu B, Ge Y-F, Fang S-G.** 2013. Patterns of genetic differentiation at MHC  
485 class I genes and microsatellites identify conservation units in the giant panda. BMC  
486 Evolutionary Biology **13**:227.
- 487 26. **Jin Y, Zhang X, Ma Y, Qiao Y, Liu X, Zhao K, Zhang C, Lin D, Fu X, Xu X.** 2017. Canine  
488 distemper viral infection threatens the giant panda population in China. Oncotarget **8**:113910-  
489 113919.
- 490 27. **Gao FS, Hu GX, Xia XZ, Gao YW, Bai YD, Zou XH.** 2009. Isolation and identification of a  
491 canine coronavirus strain from giant pandas (*Ailuropoda melanoleuca*). Journal of Veterinary  
492 Science **10**:261.
- 493 28. **Decaro N, Mari V, Elia G, Lanave G, Dowgier G, Colaianni ML, Martella V, Buonavoglia**  
494 **C.** 2015. Full-length genome analysis of canine coronavirus type I. Virus Res **210**:100-105.
- 495 29. **Nianzhi Z, Jianxun Q, Sijia F, Feng G, Jun L, Xiaocheng P, Rong C, Qirun L, Zhaosan C,**  
496 **Xiaoying L.** 2011. Crystal structure of swine major histocompatibility complex class I SLA-1  
497 0401 and identification of 2009 pandemic swine-origin influenza A H1N1 virus cytotoxic T  
498 lymphocyte epitope peptides. Journal of Virology **85**:11709-11724.
- 499 30. **Chih LY, Zhenjun C, Burrows SR, Purcell AW, James MC, Jamie R, Stephanie G.** 2012.  
500 The energetic basis underpinning T-cell receptor recognition of a super-bulged peptide bound  
501 to a major histocompatibility complex class I molecule. Journal of Biological Chemistry  
502 **287**:12267-12276.
- 503 31. **Nivarthi UK, Stephanie G, Lars KN, Richard B, Lucet IS, Miles JJ, Tracy SL, Purcell AW,**  
504 **Bowden DS, Margaret H.** 2014. An extensive antigenic footprint underpins immunodominant  
505 TCR adaptability against a hypervariable viral determinant. Journal of Immunology **193**:5402-  
506 5413.
- 507 32. **Stephanie G, Wilmann PG, Zhenjun C, Hanim H, Chih LY, Lars KN, Purcell AW,**  
508 **Burrows SR, James MC, Jamie R.** 2012. A structural basis for varied  $\alpha\beta$  TCR usage against  
509 an immunodominant EBV antigen restricted to a HLA-B8 molecule. Journal of Immunology  
510 **188**:311.
- 511 33. **Turner SJ, Doherty PC, James MC, Jamie R.** 2006. Structural determinants of T-cell receptor  
512 bias in immunity. Nature Reviews Immunology **6**:883-894.
- 513 34. **Gao GF, Tormo J, , Gerth UC, Wyer JR, Mcmichael AJ, Stuart DI, Bell JI, Jones EY,**  
514 **Jakobsen BK.** 1997. Crystal structure of the complex between human CD8alpha(alpha) and  
515 HLA-A2. Nature **387**:630-634.
- 516 35. **Li Y, Yin Y, Mariuzza RA.** 2013. Structural and biophysical insights into the role of CD4 and  
517 CD8 in T cell activation. Frontiers in Immunology **4**:206.

- 518 36. **Zhang W, Yang S, Shan T, Hou R, Liu Z, Li W, Guo L, Wang Y, Chen P, Wang X, Feng F,**  
519 **Wang H, Chen C, Shen Q, Zhou C, Hua X, Cui L, Deng X, Zhang Z, Qi D, Delwart E.**  
520 2017. Virome comparisons in wild-diseased and healthy captive giant pandas. *Microbiome* **5**:90.
- 521 37. **Li D, Ling Z, Hengmin C, Shanshan L, Shengtao F, Zhijun Y, Yuancheng Z, Tiecheng W,**  
522 **Jun Q, Xianzhu X.** 2014. Influenza A(H1N1)pdm09 virus infection in giant pandas, China.  
523 *Emerging Infectious Diseases* **20**:480-483.
- 524 38. **Castro CD, Luoma AM, Adams EJ.** 2015. Coevolution of T-cell receptors with MHC and  
525 non-MHC ligands. *Immunological Reviews* **267**:30-55.
- 526 39. **Tobita T, Oda M, Morii H, Kuroda M, Yoshino A, Azuma T, Kozono H.** 2003. A role for the  
527 P1 anchor residue in the thermal stability of MHC class II molecule I-A b. *Immunology Letters*  
528 **85**:47-52.
- 529 40. **Parkin S, Hope H.** 1998. Macromolecular Cryocrystallography: Cooling, Mounting, Storage  
530 and Transportation of Crystals. *Journal of Applied Crystallography* **31**:945-953.
- 531 41. **Otwinowski Z, Minor W.** 1997. Processing of X-ray diffraction data collected in oscillation  
532 mode. *Methods Enzymol* **276**:307-326.
- 533 42. **Emsley P, Cowtan K.** 2004. Coot: model-building tools for molecular graphics. *Acta*  
534 *crystallographica Section D, Biological crystallography* **60**:2126-2132.
- 535 43. **Adams PD, Grosse-Kunstleve RW, Hung LW, Ioerger TR, McCoy AJ, Moriarty NW, Read**  
536 **RJ, Sacchettini JC, Sauter NK, Terwilliger TC.** 2002. PHENIX: building new software for  
537 automated crystallographic structure determination. *Acta crystallographica Section D,*  
538 *Biological crystallography* **58**:1948-1954.
- 539 44. **Laskowski RA, Moss DS, Thornton JM.** 1993. Main-chain bond lengths and bond angles in  
540 protein structures. *Journal of Molecular Biology* **231**:1049-1067.
- 541 45. **Thompson JD, Gibson TJ, Plewniak F, , Jeanmougin F, , Higgins DG.** 1997. The ClustalX  
542 windows interface: flexible strategies for multiple sequence alignment aided by quality analysis  
543 tools. *Nucleic Acids Res. Nucleic Acids Research* **25**:4876-4882.
- 544 46. **Patrice G, Xavier R, Emmanuel C.** 2003. ESPript/ENDscript: Extracting and rendering  
545 sequence and 3D information from atomic structures of proteins. *Nucleic Acids Research*  
546 **31**:3320-3323.
- 547

548 FIGURES

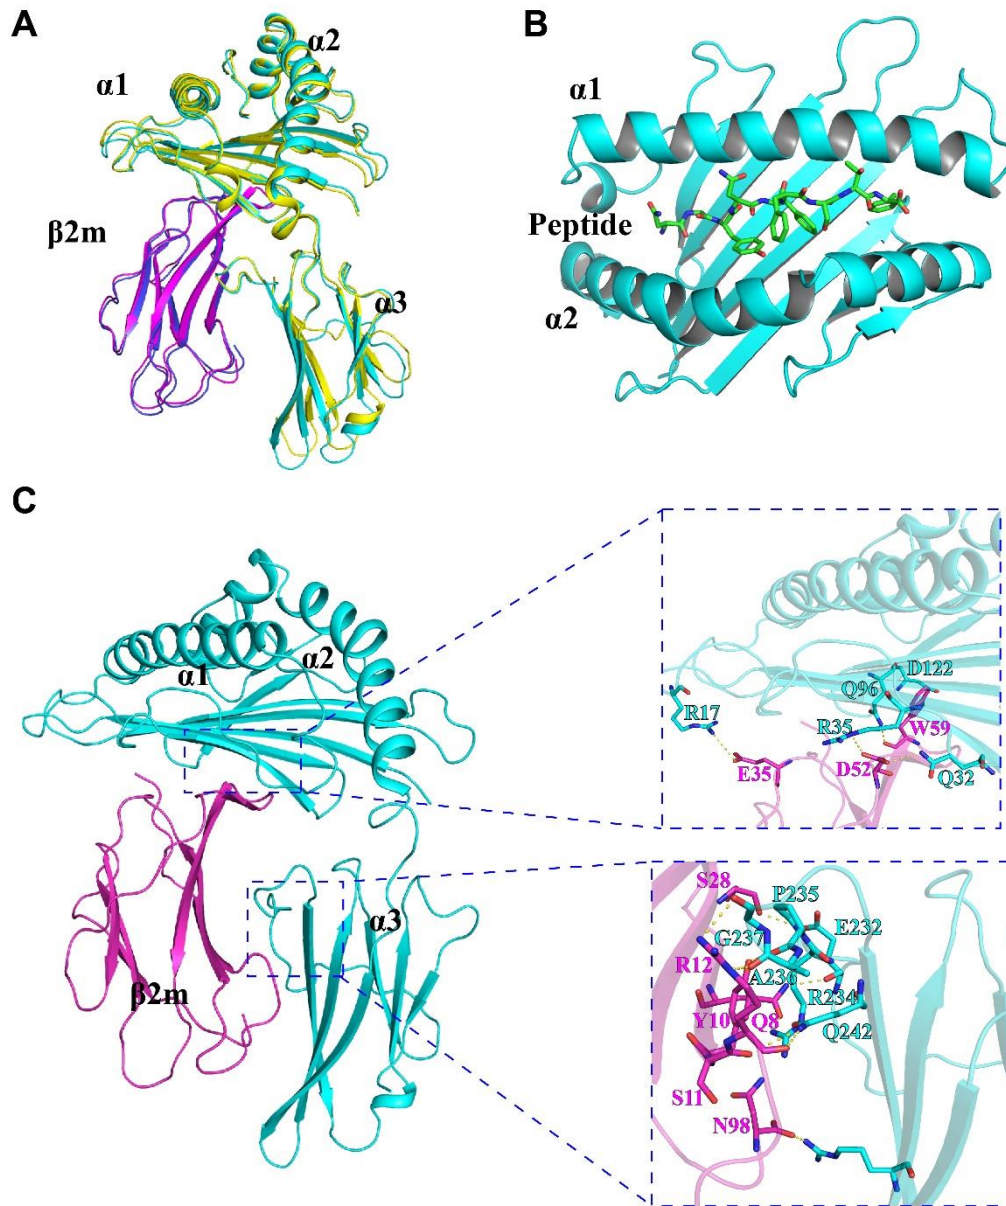

549 **FIG 1** Structure of pAime-128 complex. (A) Overview of M1 and M2 in an asymmetric unit  
550 of pAime-128 complex. Aime-128 M1 and M2 are indicated in cyan and yellow, respectively.  
551 (B) The formation of the CCV-NGY9 peptide in PBG of pAime-128. (C) Interactions between  
552 Aime-128 and Aime- $\beta2m$ . Aime-128 is shown in cyan and Aime- $\beta2m$  is shown in magenta. The  
553 hydrogen bonds formed between Aime-128 and Aime- $\beta2m$  are shown as yellow dashed lines.

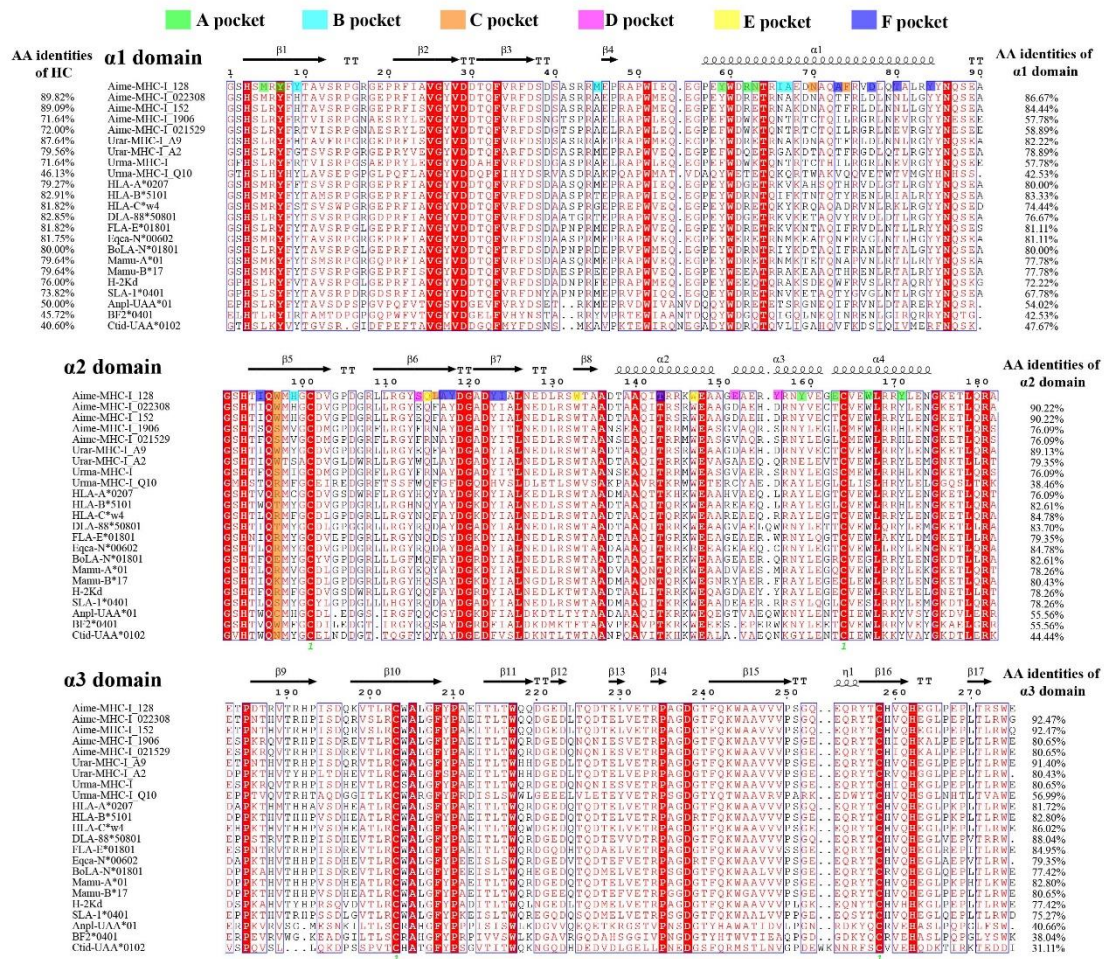

554 **FIG 2** Structure-based amino acid sequence alignment of Aime-128 and other representative  
 555 mammalian MHC-I molecules with available crystal structures. Cylinders indicate  $\alpha$  helices,  
 556 and black arrows above the alignment indicate  $\beta$  strands. The amino acid identities of different  
 557 domains between Aime-128 and the listed MHC-I molecules are given on the right-hand side.  
 558 The residue positions contributing to Aime-128 pockets are highlighted by pocket-specific  
 559 colored shading.

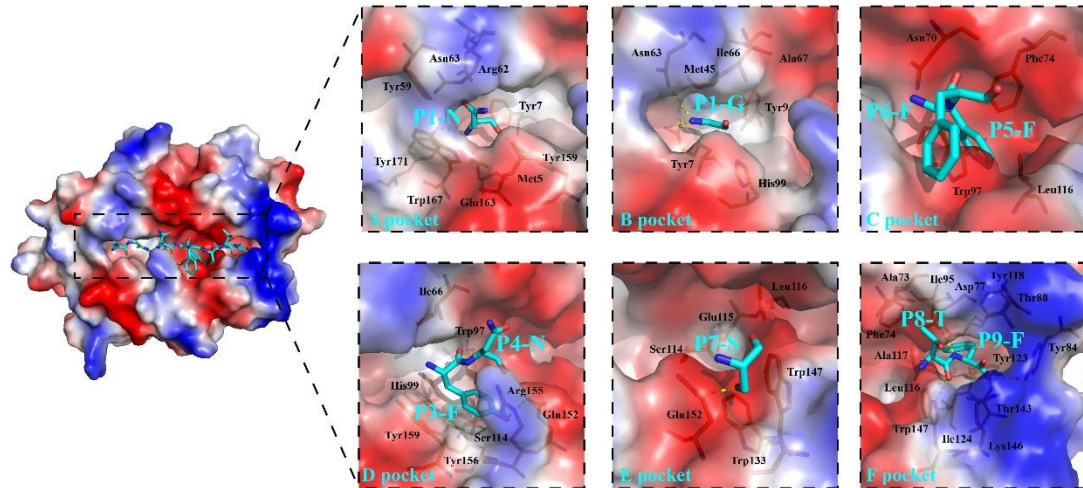

560 **FIG 3** Structural analysis and comparison of the six pockets of pAime-128 complex. The six  
561 pockets are shown in surface charge representation (blue, positively charged; red, negatively  
562 charged; white, nonpolar). The pocket residues were determined based on interaction with  
563 peptide ligand as indicated by CCP4 software and on our visual inspection of pocket continuity.  
564 The residues in PBG of pAime-128 complex are shown in stick form. The residues of CCV-  
565 NGY9 are shown as cyan sticks, and hydrogen bonds between peptide and pockets are shown  
566 as yellow dashed lines.

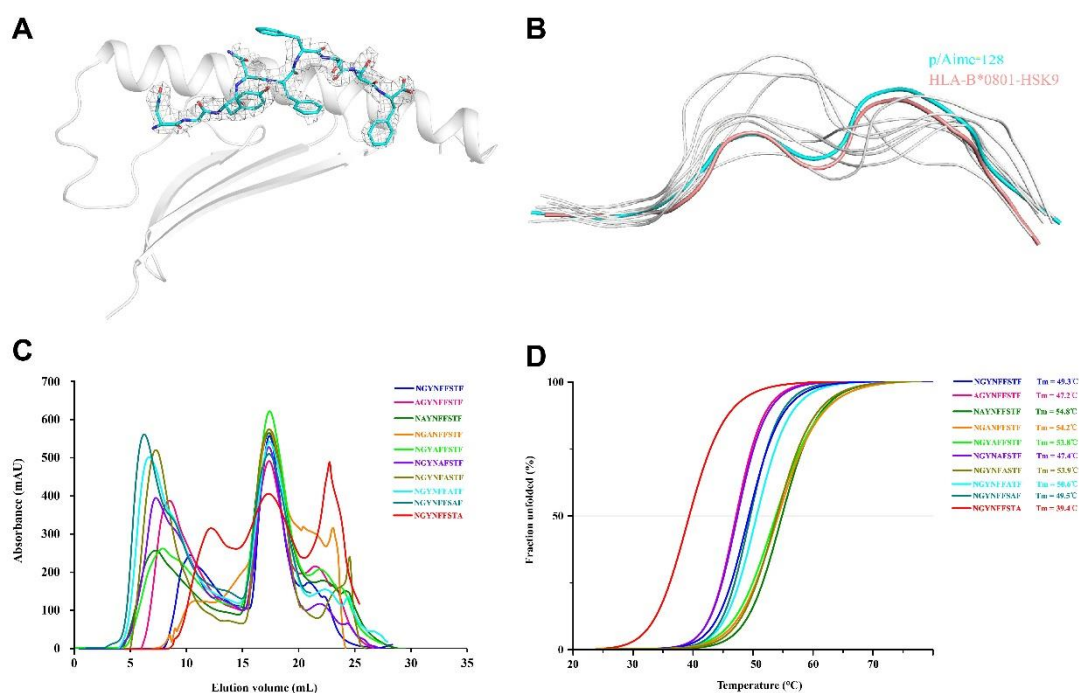

567 **FIG 4** CCV-NGY peptide conformations for TCR contacts. (A) Electron densities and overall  
 568 conformations of the structurally defined CCV-NGY9 peptides of pAime-128. (B)  
 569 Superposition of the CCV-NGY9 peptide presented by pAime-128 with nonapeptides presented  
 570 by other vertebrate MHC-I molecules. Peptides are shown as ribbons with the following color  
 571 scheme: cyan, Aime-128-CCV-NGY9; salmon, HLA-B\*0801-HSK9 (4QRP); light blue, HLA-  
 572 B\*0801-FLR9 (1MI5); and gray, peptides presented by HLA-A\*0201 (2AV1), Mamu-A\*02  
 573 (3JTT), H-2Kd (1VGK), SLA-1\*0401 (3QQ3), BoLA-A\*01801 (3PWU), FLA-E\*01801  
 574 (5XMF), DLA-88\*50801 (5F1I) and *Anpl*-UAA\*01 (5GJX). (C) The refolded products of  
 575 Aime-128 and Aime- $\beta$ 2m in the presence of mutated peptides tested by gel filtration  
 576 chromatograms. The refolding efficiencies are represented by the relevant concentration ratios  
 577 and by the heights of the peak for each mutant. The mutated peptides P1A, P5A and P9A clearly  
 578 yielded low refolding efficiency. (D) CD spectropolarimetry was utilized to assess the  
 579 thermostabilities of the purified pAime-128 complexes. Shown here are the data fitted to the  
 580 denaturation curves using the Origin 9.1 program (OriginLab). The  $T_m$  values of different  
 581 peptides are indicated by the gray line at the 50% unfolded level.

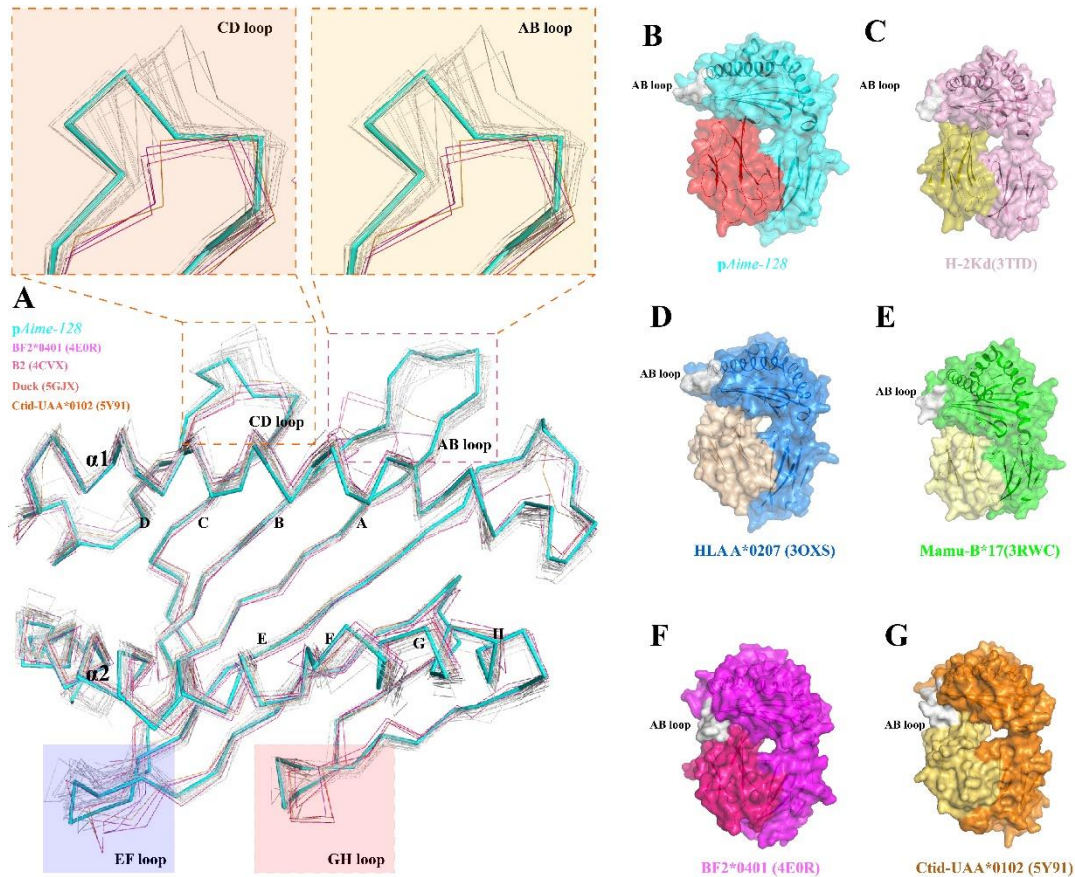

582 **FIG 5** pAime-128 complexes show some features that are similar among mammals but different  
 583 from those of lower vertebrates. (A) Unique details of the higher vertebrates in PBG. (pAime-  
 584 128 cyan, grass carp-5Y91 light orange, chicken-4E0R hot pink, duck-5GJX magenta and other  
 585 mammals (1VGK, 2XFX, 3OXS, 3PWU, 3TID, 1ZVS, 3QQ3, 3RWC, 3X11, 4QRQ, 4MJ6,  
 586 4MNX, 4N02, 4NT6, 4O2C, 4QOK, 4QRS, 5XMF, 3BUY, 1ZT7, 4WJ5 white). The AB loops  
 587 of the nonmammals are downward, which can interact with  $\beta_2m$ , while the mammals' cannot  
 588 contact  $\beta_2m$ . The CD loops of mammals are longer than those of lower vertebrates, causing the  
 589 2 more residues after the 40<sup>th</sup> amino acids of PBG in the higher vertebrates than in the  
 590 nonmammals. The EF loops of mammals are longer than those of nonmammals. There is a  
 591 hydrophobic core in the GH loop of grass carp, duck and chicken, so the GH loop is expanded  
 592 and close to  $\beta_2m$ . (B-G) The gray areas indicate the discrepant regions of MHC-I and  $\beta_2m$   
 593 interfaces among chicken, grass carp, and mammals. (B) In pAime-128, the AB loop of Aime-  
 594 128 cannot bind to  $\beta_2m$ . (C) In mouse pMHC-I structures (3TID), the AB loop cannot bind to  
 595  $\beta_2m$ . (D) In human pMHC-I structures (3OXS), the AB loop cannot bind to  $\beta_2m$ . (E) In monkey  
 596 pMHC-I structures (3RWC), the AB loop cannot bind to  $\beta_2m$ . (F) In chicken, the  
 597 BF2\*0401(4E0R) AB loop can bind to  $\beta_2m$ . (G) In grass carp (5Y91), the AB loop can bind to  
 598  $\beta_2m$ .

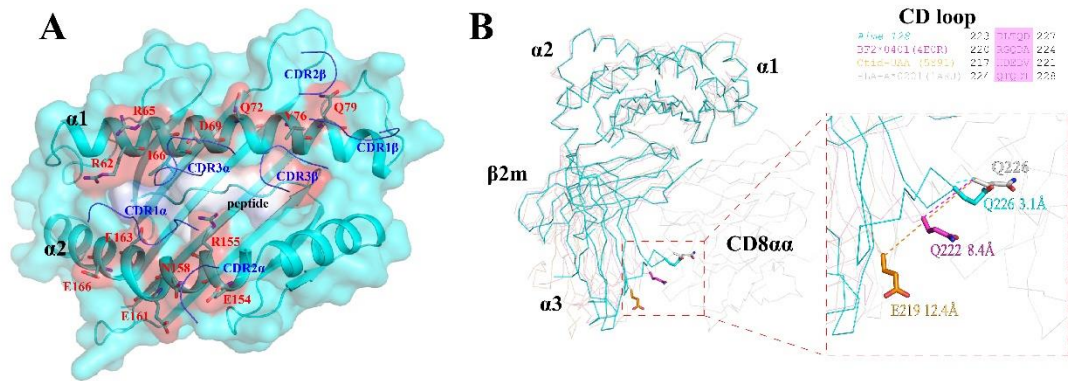

599 **FIG 6** Putative TCR docking sites on pAime-128 complexes and a unique way to bind CD8.  
 600 (A) Based on the HLA-B\*0801-HSK9-specific TCR, the residues on pAime-128 that may  
 601 contact the TCR CDR loops (green) are shown as red surfaces, and the CCV-NGY9 peptide is  
 602 shown on the surface according to its charge. The proximity of the TCR CDR loops to the  
 603 peptide-binding region of pAime-128 is shown. (B) The major shift in the  $\alpha 3$  domain and the  
 604 variation in the key residues for binding CD8 $\alpha\alpha$  in pAime-128 complexes. pAime-128 structure  
 605 is superposed on the HLA-A2-CD8 $\alpha\alpha$  (HLA-A2, white, PDB code: 1AKJ), *CtId*-UAAg (cyan,  
 606 PDB code: 5Y91) and BF2\*0401 (hot pink, PDB code: 4E0R) structures in the ribbon. The  
 607 residues shown in different colors according to their species in the CD loop that are critical for  
 608 interaction with CD8 $\alpha\alpha$  are shown in sticks. The distance between E219 of *pCtId*-UAAg and  
 609 Q226 of HLA-A\*0201 (PDB: 1AKJ) is approximately 12.4 Å, and the distance between Q222  
 610 in BF2\*0401 (PDB: 4E0R) and Q226 of HLA-A\*0201 (PDB: 1AKJ) is approximately 8.4 Å.  
 611 The distance between the superposed CD loops of pAime-128 is approximately 3.1 Å.



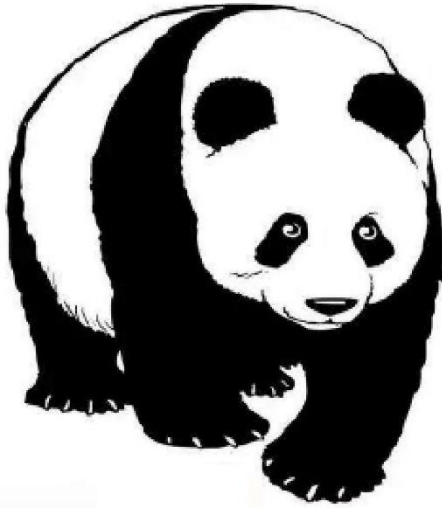

# Viruses

| Name      | Derived protein | Sequence  | % Random <sup>a</sup> | Refolding <sup>b</sup> |
|-----------|-----------------|-----------|-----------------------|------------------------|
| CDV-TSV9  | CDV H protein   | TSVGRFFPL | 0.051                 | ++                     |
| CPV-NTY9  | CPV VP1         | NTYGPLTAL | 0.055                 | ++                     |
| H7N9-EVW9 | H7N9            | EVWSYNAEL | 0.166                 | ++                     |
| CCV-NGA9  | CCV insave-1 N  | NGAKYYPQ  | 0.339                 | ++                     |
| CCV-TAL9  | CCV TN449       | TALKYLGTL | 0.287                 | ++                     |
| GPPV-ETM9 | GPPV VP2        | ETMGPLDAL | 0.180                 | ++                     |
| GPRV-TTI9 | GPRV CH-1 VP3   | TTIYYYYNL | 0.228                 | ++                     |
| GPRV-NSL9 | GPRV CH-1 VP4   | NSLRFRL   | 0.260                 | +-                     |
| GPRV-TTI9 | GPRV CH-1 VP6   | TTIEYFIDF | 0.224                 | ++                     |
| GPGE-TSS9 | GPGE ORF3       | TSSSFGSLL | 0.306                 | ++                     |
| GPAN-NTL9 | GPAN ORF1       | NTLWFRYK  | 0.302                 | ++                     |

<sup>a</sup> % Random is a base value for estimating the binding affinities of peptides with the NetMHCpan 4.0 server (<http://www.cbs.dtu.dk/services/NetMHCpan/>): Rank threshold for strongly binding peptides, 0.500; rank threshold for weakly binding peptides, 2.000  
<sup>b</sup> ++, peptide binds Aime-128 and can tolerate anion-exchange chromatography.

612 **FIG 7** Predicted peptides and their binding to Aime-128 evaluated by *in vitro* refolding.

613 **Tables**

614 **TABLE 1** Peptides refolded with the Aime-128 and the Aime- $\beta_2$ m.

| Name                  | Derived protein | Start position | Sequence  | %Random <sup>b</sup> | Refolding <sup>c</sup> |
|-----------------------|-----------------|----------------|-----------|----------------------|------------------------|
| CCV-NGY9 <sup>a</sup> | CCV spike       | 436            | NGYNFFSTF | 0.064                | ++                     |
| CDV-TSV9              | CDV H protein   | 192            | TSVGRFFPL | 0.051                | ++                     |
| CPV-NTY9              | CPV VP1         | 448            | NTYGPLTAL | 0.055                | ++                     |
| H7N9-EVW9             | H7N9            | 428            | EVWSYNAEL | 0.166                | ++                     |

615 <sup>a</sup> Peptide CCV-NGY9 was used in the structural determination of the giant panda Aime-128;

616 <sup>b</sup> % Random is a base value for estimating the binding affinities of peptides with the

617 NetMHCpan 4.0 server (<http://www.cbs.dtu.dk/services/NetMHCpan/>): Rank threshold for  
618 strongly binding peptides, 0.500; rank threshold for weakly binding peptides, 2.000

619 <sup>c</sup> ++, peptide binds Aime-128 and can tolerate anion-exchange chromatography.

620 **TABLE 2** X-ray diffraction data processing and refinement statistics.

| Statistic                                    | Value for Aime-128/CCV-NGY9 |
|----------------------------------------------|-----------------------------|
| Data processing                              |                             |
| Space group                                  | $P4_32_12$                  |
| Wavelength (Å)                               | 0.97892                     |
| Cell dimensions ( )                          |                             |
| <i>a, b, c</i> (Å)                           | 173.68, 173.68, 84.35       |
| °                                            | 90.0, 90.0, 90.0            |
| Resolution range (Å) <sup>a</sup>            | 50.00-2.68 (2.75-2.68)      |
| Total number of reflections                  | 193316                      |
| Number of unique reflections                 | 34668                       |
| Number of molecule in the asymmetric unit    | 2                           |
| Average redundancy <sup>a</sup>              | 6.8 (7.2)                   |
| Completeness (%) <sup>a</sup>                | 99.1 (100.0)                |
| $R_{\text{merge}}$ (%) <sup>b</sup>          | 9.4 (39.3)                  |
|                                              | 18.2 (10.3)                 |
| Refinement                                   |                             |
| Resolution (Å)                               | 36.62-2.68                  |
| R-factor (%)                                 | 19.0                        |
| $R_{\text{free}}$ (%) <sup>c</sup>           | 22.1                        |
| RMS deviations from restraint target values: |                             |
| Bond length (Å)                              | 0.004                       |
| Bond angles (°)                              | 0.841                       |
| Average B factor                             | 27.7                        |

621 <sup>a</sup> Numbers in parentheses indicate the highest-resolution shell.

622 <sup>b</sup>  $R_{\text{merge}} = \sum h \sum I_{ih} - \langle I_h \rangle / \sum h \sum I \langle I_h \rangle$ , where  $\langle I_h \rangle$  is the mean intensity of the observation  $I_{ih}$  of  
623 reflection  $h$ .

624 <sup>c</sup>  $R$  factor =  $\Sigma (F_{\text{obs}} - F_{\text{calc}}) / \Sigma F_{\text{obs}}$ ;  $R_{\text{free}}$  is the  $R$  factor for a subset (5%) of reflections that was  
625 selected prior to refinement calculations and not included in the refinement.

626

627 **TABLE 3** Hydrogen bonds and van der Waals interactions between peptides and Aime-128

| Hydrogen Bonds and Salt Bridge |      |                    |      |                                                                                                                                                                                                |
|--------------------------------|------|--------------------|------|------------------------------------------------------------------------------------------------------------------------------------------------------------------------------------------------|
| Peptide CCV-NGY9               |      | Aime-128           |      | Van der Waals Forces                                                                                                                                                                           |
| Residue                        | Atom | Residue            | Atom |                                                                                                                                                                                                |
| P1-Asn                         | N    | Tyr <sup>171</sup> | OH   | Met <sup>5</sup> , Tyr <sup>7</sup> , Tyr <sup>59</sup> , Arg <sup>62</sup> , Asn <sup>63</sup> , Ile <sup>66</sup> , Trp <sup>167</sup> , Tyr <sup>171</sup><br>(63)                          |
|                                | O    | Tyr <sup>159</sup> | OH   |                                                                                                                                                                                                |
| P2-Gly                         | N    | Asn <sup>63</sup>  | OD1  | Tyr <sup>7</sup> , Asn <sup>63</sup> , Ile <sup>66</sup> , Tyr <sup>159</sup> (23)                                                                                                             |
|                                |      | Tyr <sup>7</sup>   | OH   |                                                                                                                                                                                                |
| P3-Tyr                         | OH   | Glu <sup>152</sup> | OE1  | Tyr <sup>9</sup> , Ile <sup>66</sup> , Asn <sup>70</sup> , Trp <sup>97</sup> , His <sup>99</sup> , Glu <sup>152</sup> , Arg <sup>155</sup> ,<br>Tyr <sup>156</sup> , Tyr <sup>159</sup> (91)   |
|                                |      | Arg <sup>155</sup> | NE   |                                                                                                                                                                                                |
| P4-Asn                         | O    | Arg <sup>155</sup> | NH1  | Ile <sup>66</sup> , Asp <sup>69</sup> , Asn <sup>70</sup> , Arg <sup>155</sup> (27)                                                                                                            |
|                                | O    | Arg <sup>155</sup> | NH2  |                                                                                                                                                                                                |
| P5-Phe                         |      |                    |      | Asn <sup>70</sup> , Ala <sup>73</sup> , Trp <sup>97</sup> , Trp <sup>147</sup> , Glu <sup>152</sup> , Arg <sup>155</sup> (36)                                                                  |
| P6-Phe                         |      |                    |      | Glu <sup>152</sup> , Arg <sup>155</sup> (16)                                                                                                                                                   |
| P7-Ser                         | OG   | Glu <sup>152</sup> | OE2  | Trp <sup>147</sup> , Ala <sup>150</sup> , Glu <sup>152</sup> (19)                                                                                                                              |
| P8-Thr                         | O    | Trp <sup>147</sup> | NE1  | Ala <sup>73</sup> , Val <sup>76</sup> , Asp <sup>77</sup> , Thr <sup>143</sup> , Trp <sup>147</sup> (30)                                                                                       |
| P9-Phe                         | N    | Asp <sup>77</sup>  | OD1  | Asp <sup>77</sup> , Thr <sup>80</sup> , Tyr <sup>84</sup> , Ile <sup>95</sup> , Leu <sup>116</sup> , Tyr <sup>123</sup> , Thr <sup>143</sup> ,<br>Lys <sup>146</sup> , Trp <sup>147</sup> (84) |
|                                | O    | Tyr <sup>84</sup>  | OH   |                                                                                                                                                                                                |
|                                | O    | Thr <sup>143</sup> | OG1  |                                                                                                                                                                                                |
|                                | O    | Lys <sup>146</sup> | NZ   |                                                                                                                                                                                                |

628 <sup>a</sup> Numbers in parentheses are the amounts of van der Waals force.
